# Supplementary material for: When Everyone Comes, So Do the Unseen: Kenya’s UHC Pilot and the Unexpected Reach of Routine Immunization
Source: Research Square preprint supplement (doi:10.21203/rs.3.rs-7244451/v1), 2025-10-17
Supplement: Supplementary file 1 [file 5b60d5721e290b93e6f4af87.docx]

#### Supplementary material

#### Interview Guide for Healthcare Workers

**Section A: Introduction & Planning Phase**

1. What are/were your day-to-day roles and responsibilities in your current role?

Probe: *Did you have a similar role during the UHC pilot? What were your day-to-day responsibilities during the UHC pilot phase?*

1. How does your hospital conduct planning and budgeting?

Probe: *Please describe the cycle/stages of what the hospital does at various stages.*

*How do hospital planning and budgeting fit into the county planning and budgeting cycle?*

1. What are the sources of funding for your hospital?

Probe: *How did your funding sources change during the UHC pilot phase?*

1. When did your hospital begin implementing the UHC pilot program? Is the UHC pilot program still being implemented in your hospital? If so, how will the hospital implement the Universal Health Coverage (UHC) program?
2. How was the hospital prepared for the implementation of the UHC pilot?

Probe: *Indicate various steps, activities, or resources undertaken.*

1. Were you personally [or your office] involved in planning for the UHC pilot program? If yes, how?
2. To what extent was the facility involved?
3. How would you describe your level of satisfaction with the **preparation** and **planning** before the UHC pilot implementation?
4. By the facility
5. By the County

**Section B: UHC Implementation**

1. Please describe how the UHC implementation was done in your hospital.

Probe for various components/aspects (e.g., billing, staffing, service provision) and how they were implemented.

1. How did the implementation affect the usual programming/activities in the hospital? Please explain
2. How would you describe the hospital's experiences with the UHC pilot implementation?
3. In what ways did the UHC pilot affect demand for health services in your facility?

Probe: *Number of people seeking healthcare, health conditions treated at the facility, and how many people visited the facility from outside its catchment areas.*

1. How did UHC affect coverage of health interventions? What about immunization coverage?
2. How different was the immunization program during the UHC pilot phase compared to the pre-pilot and post-pilot phases?
3. How did the UHC pilot affect a hospital's quality of health care?

Probe: *Services provided, patients’ waiting time, meeting patients’ health needs, provider-patient communication*.

1. In your opinion, to what extent were patients satisfied with the UHC pilot program? Please explain.
2. What challenges did your hospital experience during the UHC pilot?

**Financing of the UHC Pilot**

| Source | Planned  Amount | Budgeted  Amount | Released  Amount | Amount  Spent/Executed |
| --- | --- | --- | --- | --- |
| National Government |  |  |  |  |
| County Government |  |  |  |  |
| Partner 1 |  |  |  |  |
| Partner 2 |  |  |  |  |
| Partner 3 |  |  |  |  |
| Partner 4 |  |  |  |  |
| Partner 5 |  |  |  |  |

1. How much was allocated to the UHC pilot program? Please indicate the amounts against the planned sources of funding.
2. *If there are any differences in the figures above*, what explains the differences?
3. Did the hospital incur any additional costs/budgets? If so, which areas experienced a deficit?
4. How would you describe the timeliness of receipt of the UHC funds by the hospital? Please explain.
5. How was immunization financing affected during the UHC pilot phase? Please compare with the pre-pilot and post-pilot phases.
6. What implications did the UHC pilot program have for human resources for health? Were there any new challenges with human resources? *If yes or no*, please provide a description.
7. What public financial management (PFM) challenges did the hospital experience during UHC pilot implementation?

**Conclusion & Recommendations**

1. What are the County's next steps concerning UHC implementation?
2. In reflection on your experiences during the UHC pilot, what recommendations would you make regarding the following:
3. National Government?
4. County Government?
5. Development Partners?
6. What specific recommendations would you make regarding immunization financing during UHC implementation?
